# Supplementary material for: Glucocorticoid Receptor Expression Predicts Good Outcome in response to Taxane-Free, Anthracycline-Based Therapy in Triple Negative Breast Cancer
Source: Hindawi journal article supplement (doi:10.1155/2020/3712825), 2020-05-20
Supplement: f1 [file 3712825.f1.pdf]

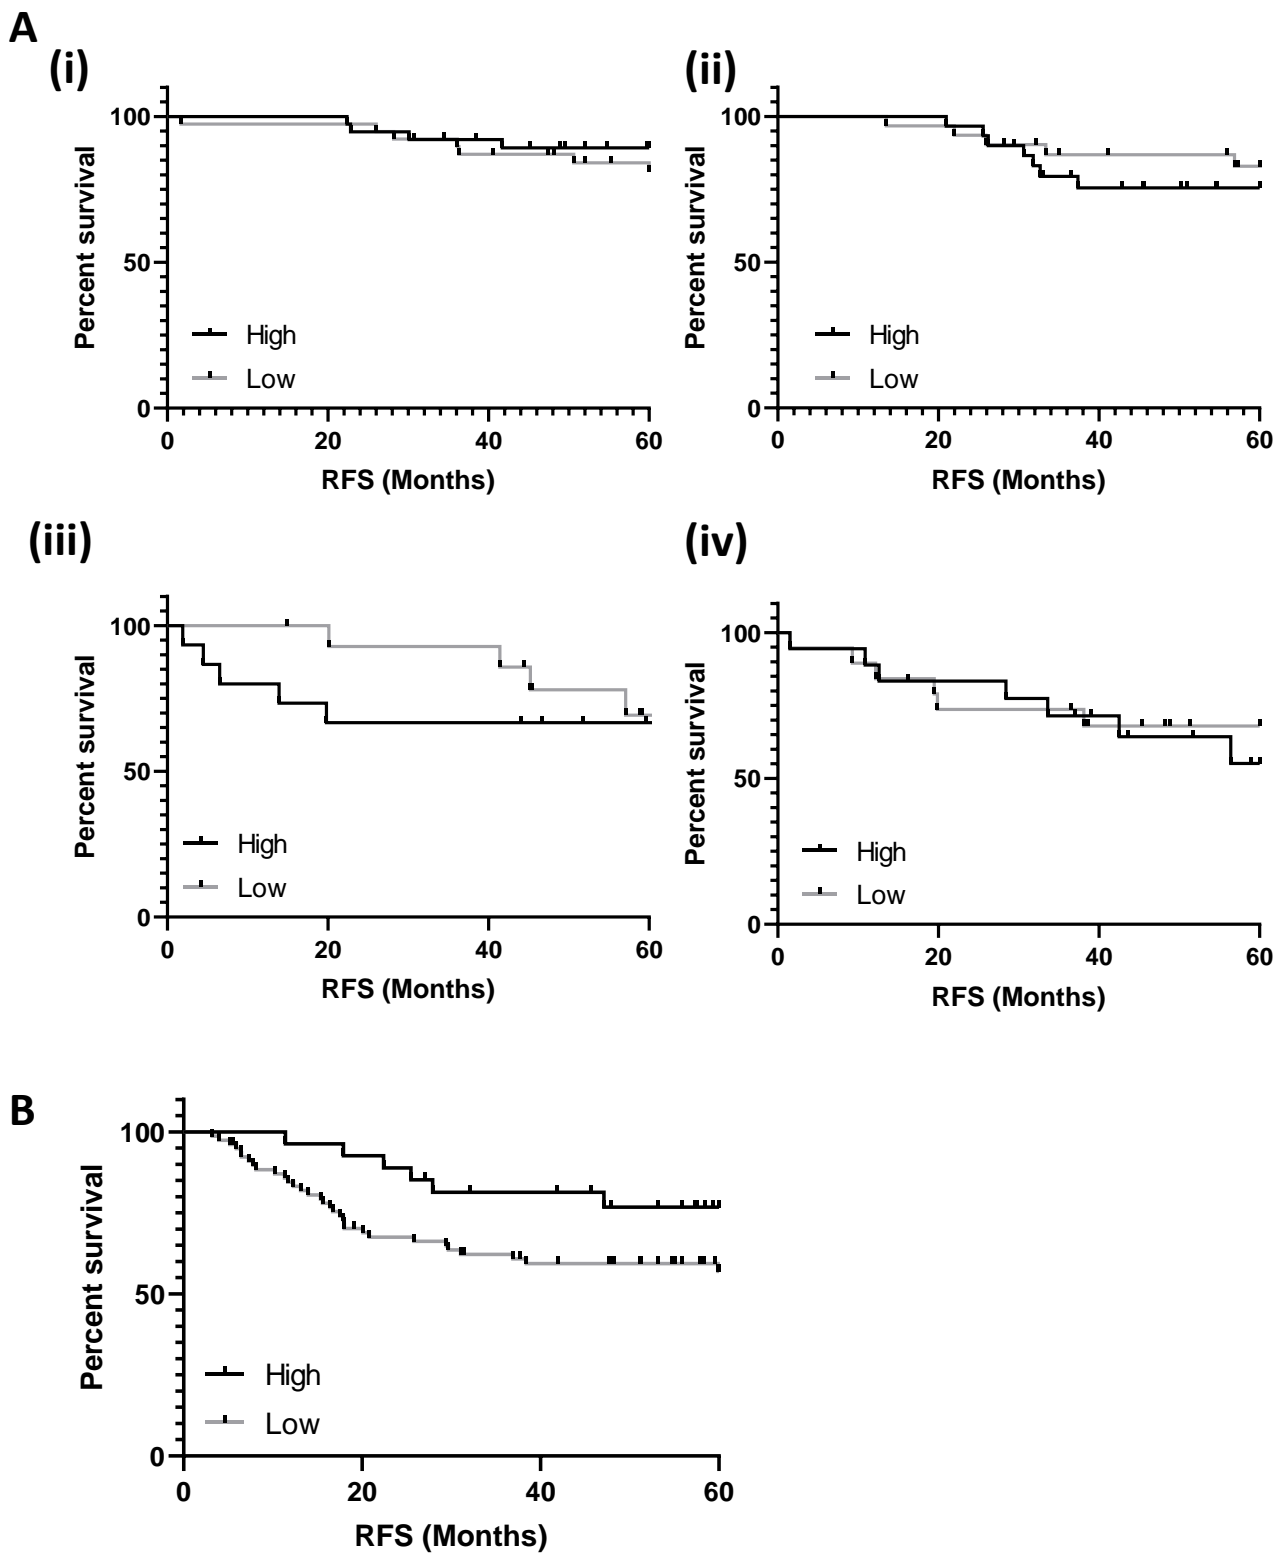

**Supp Figure 1 A** Kaplan Meier Curve of relapse free survival in the in-house dataset based on GR gene expression above (high) and below (low) the median split into the St Gallen subgroups (i) Luminal A (N=77), (ii) Luminal B HER2 positive (N=61), (iii) Luminal B HER2 negative (N=30) (iv) HER2 Enriched (N=37).

**B** Kaplan Meier curve of relapse free survival in anthracycline treated TNBC patients in TMA #2 and TMA #4 combined (N=105).

**Supp Table 1** Summary of assigned IHC H-scores in the tumour and stromal compartments in TMAs #1-4.

| <b>TMA #1<br/>(N=57)</b>  | <b>Tumour<br/>Score</b> | <b>Cases</b> | <b>Stroma<br/>Score</b> | <b>Cases</b> |
|---------------------------|-------------------------|--------------|-------------------------|--------------|
|                           | 0                       | 14           | 0                       | 3            |
|                           | 1-100                   | 32           | 1-100                   | 10           |
|                           | 101-200                 | 6            | 101-200                 | 21           |
|                           | 201-300                 | 5            | 201-300                 | 23           |
| <b>TMA #2<br/>(N=64)</b>  | <b>Tumour<br/>Score</b> | <b>Cases</b> | <b>Stroma<br/>Score</b> | <b>Cases</b> |
|                           | 0                       | 16           | 0                       | 6            |
|                           | 1-100                   | 30           | 1-100                   | 10           |
|                           | 101-200                 | 12           | 101-200                 | 15           |
|                           | 201-300                 | 6            | 201-300                 | 33           |
| <b>TMA #3<br/>(N=112)</b> | <b>Tumour<br/>Score</b> | <b>Cases</b> | <b>Stroma<br/>Score</b> | <b>Cases</b> |
|                           | 0                       | 19           | 0                       | 3            |
|                           | 1-100                   | 43           | 1-100                   | 7            |
|                           | 101-200                 | 35           | 101-200                 | 37           |
|                           | 201-300                 | 15           | 201-300                 | 65           |
| <b>TMA #4<br/>(N=62)</b>  | <b>Tumour<br/>Score</b> | <b>Cases</b> | <b>Stroma<br/>Score</b> | <b>Cases</b> |
|                           | 0                       | 26           | 0                       | 6            |
|                           | 1-100                   | 13           | 1-100                   | 6            |
|                           | 101-200                 | 12           | 101-200                 | 19           |
|                           | 201-300                 | 11           | 201-300                 | 31           |

**Supp. Table 2** Log rank hazard ratios, 95% confidence intervals and p-values for survival analysis of metastasis/event free survival dichotomised based on below (low) or above (high) median gene expression of GR in the publicly available datasets, GSE58812 and GSE31519, respectively

|                                 |      | <b>N (n)</b> | <b>HR</b> | <b>95% CI</b> | <b>P-value</b> |
|---------------------------------|------|--------------|-----------|---------------|----------------|
| <b>Metastasis Free Survival</b> |      | 107 (31)     |           |               |                |
| <b>GR</b>                       | Low  | 54 (20)      | 1         |               |                |
|                                 | High | 53 (11)      | 0.4843    | 0.2392-0.9805 | 0.0478*        |
| <b>Event Free Survival</b>      |      | 62 (21)      |           |               |                |
| <b>GR</b>                       | Low  | 31 (14)      | 1         |               |                |
|                                 | High | 31 (7)       | 0.4108    | 0.1739-0.9703 | 0.0432*        |

**Supp. Table 3** Log rank hazard ratios, 95% confidence intervals and p-values for survival analysis of metastasis/event free survival dichotomised based on below (low) or above (high) median gene expression of GR in the publicly available dataset, GSE7390.

| <b>GSE 7390</b>              |      | <b>N (n)</b> | <b>HR</b> | <b>95% CI</b> | <b>P-value</b> |
|------------------------------|------|--------------|-----------|---------------|----------------|
| <b>Relapse Free Survival</b> |      | 64 (32)      |           |               |                |
| <b>GR</b>                    | Low  | 32 (11)      | 1         |               |                |
|                              | High | 32 (21)      | 2.553     | 1.267-5.142   | 0.0087**       |
| <b>Overall Survival</b>      |      | 64 (32)      |           |               |                |
| <b>GR</b>                    | Low  | 32 (8)       | 1         |               |                |
|                              | High | 32 (17)      | 2.615     | 1.189-5.751   | 0.0196*        |

**Supp. Table 4** Log rank hazard ratios, 95% confidence intervals and p-values for survival analysis relapse free/overall survival stratified by high or low GR IHC expression in (A) TMA #1 and (B) TMA #2.

| <b>A</b>                     |      |              |           |                    |                |
|------------------------------|------|--------------|-----------|--------------------|----------------|
| <b>TMA #1</b>                |      | <b>N (n)</b> | <b>HR</b> | <b>95% CI</b>      | <b>P-value</b> |
| <b>Relapse Free Survival</b> |      | 57 (16)      |           |                    |                |
| <b>GR</b>                    | Low  | 43 (12)      | 1         |                    |                |
|                              | High | 14 (4)       | 0.8724    | 0.2917-<br>2.609   | 0.8122         |
| <b>Overall Survival</b>      |      | 57 (12)      |           |                    |                |
| <b>GR</b>                    | Low  | 42 (12)      | 1         |                    |                |
|                              | High | 15 (0)       | 0.2296    | 0.06689-<br>0.7882 | 0.0194*        |
| <b>B</b>                     |      |              |           |                    |                |
| <b>TMA #2</b>                |      | <b>N (n)</b> | <b>HR</b> | <b>95% CI</b>      | <b>P-value</b> |
| <b>Relapse Free Survival</b> |      | 64 (26)      |           |                    |                |
| <b>GR</b>                    | Low  | 58 (25)      | 1         |                    |                |
|                              | High | 6 (1)        | 0.3189    | 0.09401-<br>1.082  | 0.2365         |
| <b>Overall Survival</b>      |      | 63 (18)      |           |                    |                |
| <b>GR</b>                    | Low  | 57 (18)      | 1         |                    |                |
|                              | High | 6 (0)        | 0.3201    | 0.07484-<br>1.370  | 0.1246         |

**Supp. Table 5** Log rank hazard ratios, 95% confidence intervals and p-values for survival analysis relapse free/overall survival stratified by high or low GR IHC expression in (A) CMF treated patients in TMA #3 and (B) Taxane treated patients in TMA #3.

| <b>A</b>                     |      |              |           |                  |                |
|------------------------------|------|--------------|-----------|------------------|----------------|
| <b>TMA #3 CMF</b>            |      | <b>N (n)</b> | <b>HR</b> | <b>95% CI</b>    | <b>P-value</b> |
| <b>Relapse Free Survival</b> |      | 77 (32)      |           |                  |                |
| <b>GR</b>                    | Low  | 63 (27)      | 1         |                  |                |
|                              | High | 14 (5)       | 0.7407    | 0.3115-<br>1.761 | 0.5343         |
| <b>Overall Survival</b>      |      | 77 (28)      |           |                  |                |
| <b>GR</b>                    | Low  | 63 (23)      | 1         |                  |                |
|                              | High | 14 (5)       | 0.9010    | 0.3534-<br>2.298 | 0.8324         |
| <b>B</b>                     |      |              |           |                  |                |
| <b>TMA #3 Taxane</b>         |      | <b>N (n)</b> | <b>HR</b> | <b>95% CI</b>    | <b>P-value</b> |
| <b>Relapse Free Survival</b> |      | 18 (5)       |           |                  |                |
| <b>GR</b>                    | Low  | 13 (2)       | 1         |                  |                |
|                              | High | 5 (3)        | 4.939     | 0.6210-<br>39.28 | 0.2365         |
| <b>Overall Survival</b>      |      | 18 (3)       |           |                  |                |
| <b>GR</b>                    | Low  | 13 (2)       | 1         |                  |                |
|                              | High | 5 (1)        | 1.424     | 0.1079-<br>18.79 | 0.7717         |

**Supp. Table 6** Log rank hazard ratios, 95% confidence intervals and p-values for survival analysis relapse free/overall survival stratified by high or low GR IHC expression in (A) All patients in TMA #4 and (B) Anthracycline treated patients in TMA #4.

| <b>A</b>                     |      |              |           |               |                |
|------------------------------|------|--------------|-----------|---------------|----------------|
| <b>TMA #4 All</b>            |      | <b>N (n)</b> | <b>HR</b> | <b>95% CI</b> | <b>P-value</b> |
| <b>Relapse Free Survival</b> |      | 62 (25)      |           |               |                |
| <b>GR</b>                    | Low  | 39 (17)      | 1         |               |                |
|                              | High | 23 (15)      | 0.7726    | 0.3443-1.734  | 0.5458         |
| <b>Overall Survival</b>      |      | 62 (25)      |           |               |                |
| <b>GR</b>                    | Low  | 39 (17)      | 1         |               |                |
|                              | High | 23 (15)      | 0.7301    | 0.3271-1.630  | 0.4610         |
| <b>B</b>                     |      |              |           |               |                |
| <b>TMA #4 Anthracycline</b>  |      | <b>N (n)</b> | <b>HR</b> | <b>95% CI</b> | <b>P-value</b> |
| <b>Relapse Free Survival</b> |      | 41 (13)      |           |               |                |
| <b>GR</b>                    | Low  | 21 (5)       | 1         |               |                |
|                              | High | 20 (8)       | 0.5175    | 0.1736-1.542  | 0.2390         |
| <b>Overall Survival</b>      |      | 41 (13)      |           |               |                |
| <b>GR</b>                    | Low  | 21 (5)       | 1         |               |                |
|                              | High | 20 (8)       | 0.4929    | 0.1649-1.473  | 0.2038         |
